# Supplementary material for: Structural rearrangements allow nucleic acid discrimination by type I-D Cascade
Source: PubMed Central journal article supplement (PMC9123187; doi:10.1038/s41467-022-30402-8), 2022-05-20

## **Supplementary Information**

### **Structural basis for PAM-dependent recognition of nucleic acids by type I-D Cascade**

Evan A. Schwartz, Tess M. McBride, Jack P.K. Bravo, Daniel Wrapp, Peter C. Fineran, Robert D. Fagerlund, and David W. Taylor

**Supplementary Table 1: Plasmids used in this study.**

| Plasmid     | Description                                                                            | Reference                  |
|-------------|----------------------------------------------------------------------------------------|----------------------------|
| pSEVA251    | Replicative plasmid, RSF1010 replicon, KmR                                             | (Silva-Rocha et al., 2013) |
| pSEVA1810   | pBAD/AraC promoter, pUC replicon, ApR                                                  | (Silva-Rocha et al., 2013) |
| pACYCDuet-1 | Two T7/LacO promoters with P15A replicon, CmR                                          | Novagen                    |
| pPF1549     | N-His <sub>6</sub> -tagged Cas10d, Cas7d, and Cas5d, pQE-80LoriT                       | (McBride et al., 2020)     |
| pPF1552     | N-His <sub>6</sub> -tagged Cas6d, Spacer1 of CRISPR array, pACYCDuet-1                 | (McBride et al., 2020)     |
| pPF1590     | pcloDF13, pBAD30                                                                       | This study                 |
| pPF1609     | Spacer 1 of the type I-D array flanked by 5'-GTT-3' PAM, pBAD/AraC promoter, pBAD30    | This study                 |
| pPF1610     | Spacer 1 of the type I-D array flanked by 5'-AAC-3' PAM, pBAD/AraC promoter, pBAD30    | This study                 |
| pPF1719     | pBAD/AraC promoter, pSEVA251                                                           | This study                 |
| pPF2451     | N-His <sub>10</sub> tag, pACYCDuet-1                                                   | This study                 |
| pPF2452     | N-His <sub>10</sub> tagged Cas5d, Cas6d, Cas11d, pACYCDuet-1                           | This study                 |
| pPF2453     | N-His <sub>10</sub> tagged Cas5d, Cas6d, Cas11d, spacer 1 of CRISPR array, pACYCDuet-1 | This study                 |
| pPF2455     | Cas10d, Cas7d, pSEVA251                                                                | This study                 |
| pPF3021     | Modified pPF2455 with Cas10d(K326P)                                                    | This study                 |
| pPF3023     | Modified pPF2455 with Cas10d(K326A)                                                    | This study                 |
| pPF3026     | Modified pPF2455 with Cas10d( $\Delta$ S432-Y437)                                      | This study                 |
| pPF3025     | Modified pPF2453 with Cas5d(K114A)                                                     | This study                 |

**Supplementary Table 2:** Oligonucleotides used in this study.

| Name   | Sequence (5'-3')                                                             | Notes (PAM and PFS bolded)        | Restriction site (underlined) |
|--------|------------------------------------------------------------------------------|-----------------------------------|-------------------------------|
| PF2937 | AGTCC <u>CATATG</u> TTTTCCCCGTAAGGGGTCTGGAGG                                 | F repeats and spacer 1            | NdeI                          |
| PF2938 | ATGCGGT <u>ACCAAGATGG</u> CACTAGATACTAACTCAAACC                              | R repeats and spacer 1            | KpnI                          |
| PF3079 | /5IRD800CWN/UCACUAGAUCUCGUGCCCACACCCCCGCU<br>UUCCCUUUCAGCUCAGCACAAUUCGACGUAU | NS ssRNA,<br>IRDye800             | -                             |
| PF3089 | CTAGTATCAC <b>GTT</b> GATTGTTGTGCCCTGGCGGTCTGCTTTC<br>AATGCCTCGATCC          | F 5'-GTT-3'<br>PAM<br>protospacer | SpeI                          |
| PF3090 | <u>TCGAGGATCGAGGCATTGAAAGCGACCGCCAGGGGCACA</u><br>ACAATC <b>AAC</b> GTGATA   | R 5'-GTT-3'<br>PAM<br>protospacer | XhoI*                         |
| PF3091 | CTAGTATCAC <b>AAC</b> GATTGTTGTGCCCTGGCGGTCTGCTTT<br>CAATGCCTCGATCC          | F 5'-AAC-3'<br>PAM<br>protospacer | SpeI                          |
| PF3092 | <u>TCGAGGATCGAGGCATTGAAAGCGACCGCCAGGGGCACA</u><br>ACAATC <b>GTT</b> GTGATA   | R 5'-AAC-3'<br>PAM<br>protospacer | XhoI*                         |
| PF3158 | /5IRD700/CGCAACTCTCTACTGTTTCTCCATACC                                         | F dsDNA<br>probes,<br>IRDye700    | -                             |

|        |                                                                                         |                                 |       |
|--------|-----------------------------------------------------------------------------------------|---------------------------------|-------|
| PF3160 | /5IRD700/CTCCTCGCCCTTGCTCACCATAAG                                                       | R dsDNA probes, IRDye700        | -     |
| PF3167 | /5IRD800CWN/GCAUGACGGAUCGAGGCAUUGAAAGCGAC CGCCAGGGGCACAACAAUCA <b>CAAC</b> GUGAUACUA    | 5'-AAC-3' PFS ssRNA,            | -     |
| PF3653 | TATACCATGGGCCATCACCATCACCATCATCACCATCACCA CGATTACGATATCCCAACG                           | F His <sub>10</sub> -TEV-linker | NcoI  |
| PF3654 | TGTGGATCCGCCTCCACCGCCCTGAAAATACAGGTTTTTCG GTCGTTGGGATATCGTAATC                          | R His <sub>10</sub> -TEV-linker | BamHI |
| PF4095 | /5IRD700/CTCTCTACTGTTTCTCCCTAG                                                          | F dsDNA probes, IRDye700        | -     |
| PF4096 | /5IRD700/TCGCCCTTGCTCACCATATG                                                           | R dsDNA probes, IRDye700        | -     |
| PF4099 | GTCGACCTCACTAGTATCAC <b>GTT</b> GATTGTTGTGCCCTGG CGGTCGCTTTCAATGCCTCGATCCTCGAGGCATGCGAT | 5'-GTT-3' PAM Duplex dsDNA      | -     |
| PF4100 | GAUCGAGGCAUUGAAAGCGACCGCCAGGGGCACAACAAU <b>CAAC</b> GUGAUACUAG                          | 5'-AAC-3' PFS ssRNA             | -     |
| PF4980 | CAGGGCGGTGGAGGCGGATCCATGACAAAAATTTATCGCT GTAAATTA ACTCTC                                | F <i>cas5d</i>                  | BamHI |
| PF4981 | CATAGTATATCTCCTTATTCTGCAGTCATCCATGATTGTTAA CTGAAACCTG                                   | R <i>cas6d</i>                  | PstI  |
| PF4982 | GACTGCAGAATAAGGAGATATACTATGACCGAAAAATTGAA ACTGACTAAACG                                  | F <i>cas11d</i>                 | PstI  |

|        |                                                                                                                                                             |                                                 |         |
|--------|-------------------------------------------------------------------------------------------------------------------------------------------------------------|-------------------------------------------------|---------|
| PF4983 | CATTATGCGGCCGCAAGCTTTTAGTTTTGGTTTTGTTGTGC<br>TTCTAGAG                                                                                                       | R <i>cas11d</i>                                 | HindIII |
| PF4991 | CGAATTCGAGCTCGGTACCAATAAGGAGATATACTATGACA<br>ACACTTCTTCAAACCTTTGC                                                                                           | F <i>cas10d</i>                                 | KpnI    |
| PF4992 | CGACGCGGCCGCAAGCTTGCATGCCTAAGACTTTGCCTTC<br>TTCTTACCAC                                                                                                      | R <i>cas7d</i>                                  | SphI    |
| PF5590 | CTCTCTACTGTTTCTCCCCTAGGCCGCGGCCGCGCGAATT<br>CGAGCTCGGTACCC <b>CGT</b> GATTGTTGTGCCCTGGCGGTTCG<br>CTTCAATGCCTGCATGCAAGCTTAGGAGGAAAAACATATG<br>GTGAGCAAGGGCGA | gBlock 5'-CGT-<br>3' PAM<br>protospacer         | -       |
| PF5591 | /5IRD800CWN/GCAUGACGGAUCGAGGCAUUGAAAGCGAC<br>CGCCAGGGGCACAACAAUC <b>ACGG</b> UGAUACUA                                                                       | 5'-ACG-3' PFS<br>ssRNA,<br>IRDye800             | -       |
| PF5633 | GATGGGGCAGGCTTAAAGGTTTCTCCCCAAC                                                                                                                             | F <i>cas10d</i> K326A<br>mutant                 | -       |
| PF5634 | GAGAAACCTTTAAGCCTGCCCATCCCGTTTAAACCTAC                                                                                                                      | R <i>cas10d</i> K326A<br>mutant                 | -       |
| PF6197 | CGGGATGGGCCAGGCTTAAAGGTTTCTCCCC                                                                                                                             | F <i>cas10d</i> K326P<br>mutant                 | -       |
| PF6198 | CTTTAAGCCTGGCCCATCCCGTTTAAACCTAC                                                                                                                            | R <i>cas10d</i> K326P<br>mutant                 | -       |
| PF6205 | CAATTTGGTGGGGCAGGTGCAACCAAAACTATCCG                                                                                                                         | F <i>cas5</i> K114A<br>mutant                   | -       |
| PF6206 | GTTGCACCTGCCCCACCAAATTGAACAGAACG                                                                                                                            | R <i>cas5</i> K114A<br>mutant                   | -       |
| PF6207 | CCAAGTGCAAGGCTGGTATCGGGTTGCAG                                                                                                                               | F <i>cas10d</i><br>$\Delta$ S432-Y437<br>mutant | -       |
| PF6208 | GATACCAGCCTTGCACTTGGGTTTCTCCGG                                                                                                                              | R <i>cas10d</i><br>$\Delta$ S432-Y437<br>mutant | -       |

\*Partial restriction enzyme recognition site

**Supplementary Table 3:** Bacterial strains used in this study.

| Strain                        | Genotype/Phenotype/Description                                                                                                                                                                                                                                                                                      | Reference |
|-------------------------------|---------------------------------------------------------------------------------------------------------------------------------------------------------------------------------------------------------------------------------------------------------------------------------------------------------------------|-----------|
| DH5 $\alpha$                  | <i>E. coli</i> F <sup>-</sup> , $\phi$ 80dlacZ $\Delta$ M15, $\Delta$ (lacZYA-argF)U169, <i>endA1</i> , <i>recA1</i> , <i>hsdR17</i> (r $\kappa$ m $\kappa$ <sup>+</sup> ), <i>deoR</i> , <i>thi-1</i> , <i>supE44</i> , $\lambda$ <sup>-</sup> , <i>gyrA96</i> , <i>relA1</i>                                      | Gibco/BRL |
| LOBSTR                        | <i>E. coli</i> B F <sup>-</sup> <i>ompT</i> , <i>gal</i> , <i>dcm</i> , <i>lon</i> , <i>hsdS<sub>B</sub></i> (r $\beta$ <sup>-</sup> m $\beta$ <sup>-</sup> ), $\lambda$ (DE3 [ <i>lacI lacUV5-T7p07 ind1 sam7 nin5</i> ]) [ <i>malB</i> <sup>+</sup> ] <sub>K-12</sub> ( $\lambda$ <sup>S</sup> ) <i>arnA slyD</i> | Kerafast  |
| <i>Synechocystis</i> PCC 6803 | sp. Glucose tolerant laboratory wild-type strain GT-01                                                                                                                                                                                                                                                              | 70,71     |

**Supplementary Table 4:** Cryo-EM data collection, map, and model statistics.

|                                                  | dsDNA-bound Cascade<br>(EMD-24974)<br>(PDB 7SBA) | ssRNA-bound Cascade<br>(EMD-24976)<br>(PDB 7SBB) |
|--------------------------------------------------|--------------------------------------------------|--------------------------------------------------|
| <b>Data collection and processing</b>            |                                                  |                                                  |
| Magnification                                    | 22500                                            | 22500                                            |
| Voltage (kV)                                     | 300                                              | 300                                              |
| Electron exposure (e-/Å <sup>2</sup> )           | 41.2                                             | 41.2                                             |
| Defocus range (μm)                               | -1 to -2.2                                       | -1 to -2.2                                       |
| Pixel size (Å)                                   | 1.045                                            | 1.045                                            |
| Symmetry imposed                                 | C1                                               | C1                                               |
| Initial particle images (no.)                    | 4,111,214                                        | 4,111,214                                        |
| Final particle images (no.)                      | 336,400                                          | 167,273                                          |
| Map resolution (Å)                               | 2.9                                              | 3.1                                              |
| FSC threshold                                    | 0.143                                            | 0.143                                            |
| Map resolution range (Å)                         | 2.6 to >7                                        | 3.1 to >9                                        |
| <b>Refinement</b>                                |                                                  |                                                  |
| Model resolution (Å)                             | 3.3                                              | 3.5                                              |
| FSC threshold                                    | 0.5                                              | 0.5                                              |
| Model resolution range (Å)                       | N/A                                              | N/A                                              |
| Map sharpening <i>B</i> factor (Å <sup>2</sup> ) | N/A                                              | N/A                                              |
| Model composition                                |                                                  |                                                  |
| Non-hydrogen atoms                               | 60189                                            | 56232                                            |
| Protein residues                                 | 3669                                             | 3415                                             |
| Ligands                                          | 0                                                | 0                                                |
| <i>B</i> factors (Å <sup>2</sup> )               |                                                  |                                                  |
| Protein                                          | 43.90/171.82/73.36                               | 43.21/196.00/77.48                               |
| Nucleotide                                       | 43.61/124.23/70.66                               | 44.49/102.27/71.18                               |
| R.m.s. deviations                                |                                                  |                                                  |
| Bond lengths (Å)                                 | 0.013                                            | 0.013                                            |
| Bond angles (°)                                  | 2.02                                             | 2.112                                            |
| <b>Validation</b>                                |                                                  |                                                  |
| MolProbity score                                 | 1.58                                             | 1.95                                             |
| Clashscore                                       | 1.84                                             | 5.06                                             |
| Poor rotamers (%)                                | 2.75                                             | 3                                                |
| Ramachandran plot                                |                                                  |                                                  |
| Favored (%)                                      | 95.69                                            | 95.35                                            |
| Allowed (%)                                      | 4.20                                             | 4.50                                             |
| Disallowed (%)                                   | 0.11                                             | 0.15                                             |

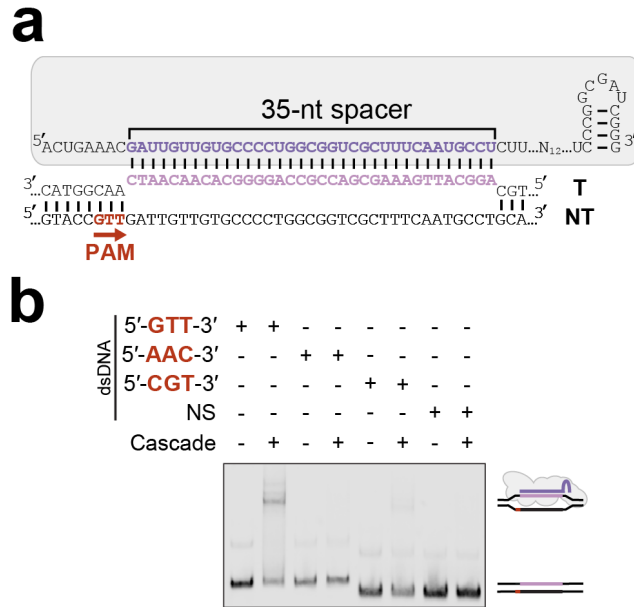

**Supplementary Fig. 1: PAM-dependent dsDNA binding.** **a**, Schematic representation of type I-D Cascade (grey protein and purple crRNA) binding to complementary target sequence (protospacer; pink). **b**, Representative mobility shifts of fluorescently labeled protospacer dsDNA with various three nucleotide protospacer adjacent motif (PAM), 5'-GTT-3' 5'-AAC-3', and 5'-CGT-3', and a non-specific (NS) probe on the NT strand, with or without 400 nM type I-D Cascade. Three independent assays were performed. Uncropped gel image is provided as Supplementary Data 1.



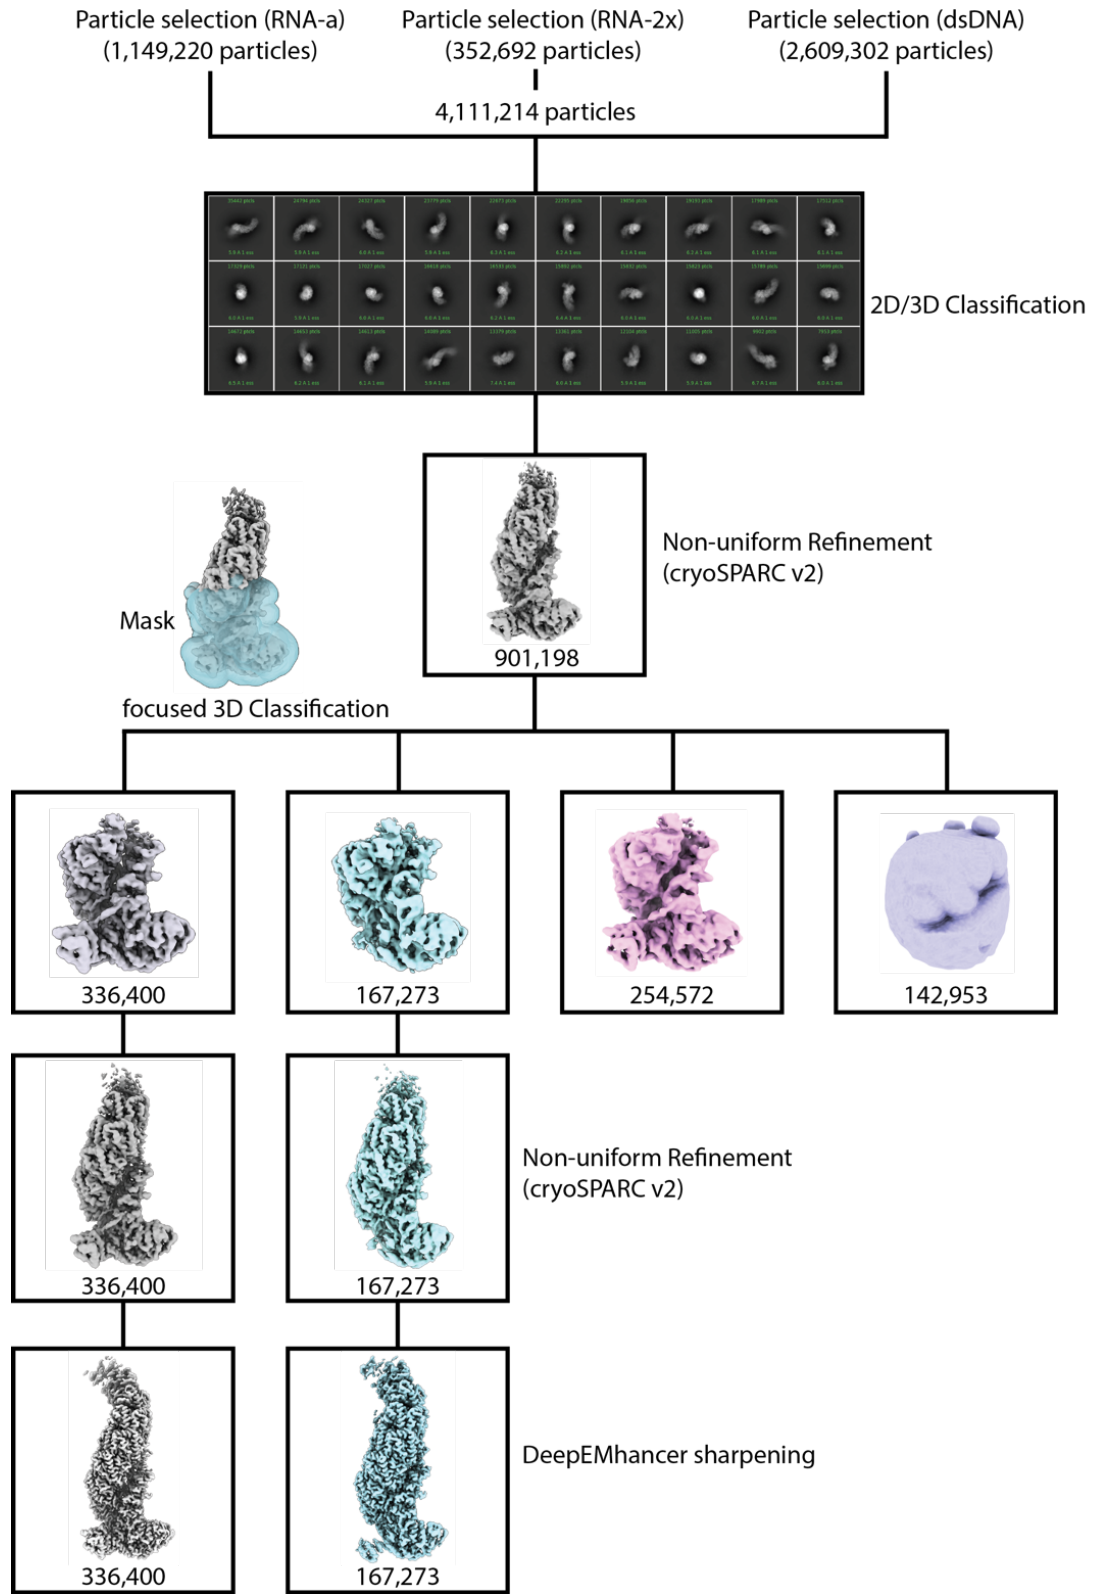

**Supplementary Fig. 2: Simplified cryo-EM data processing workflow.** The full workflow is described in **Methods**.

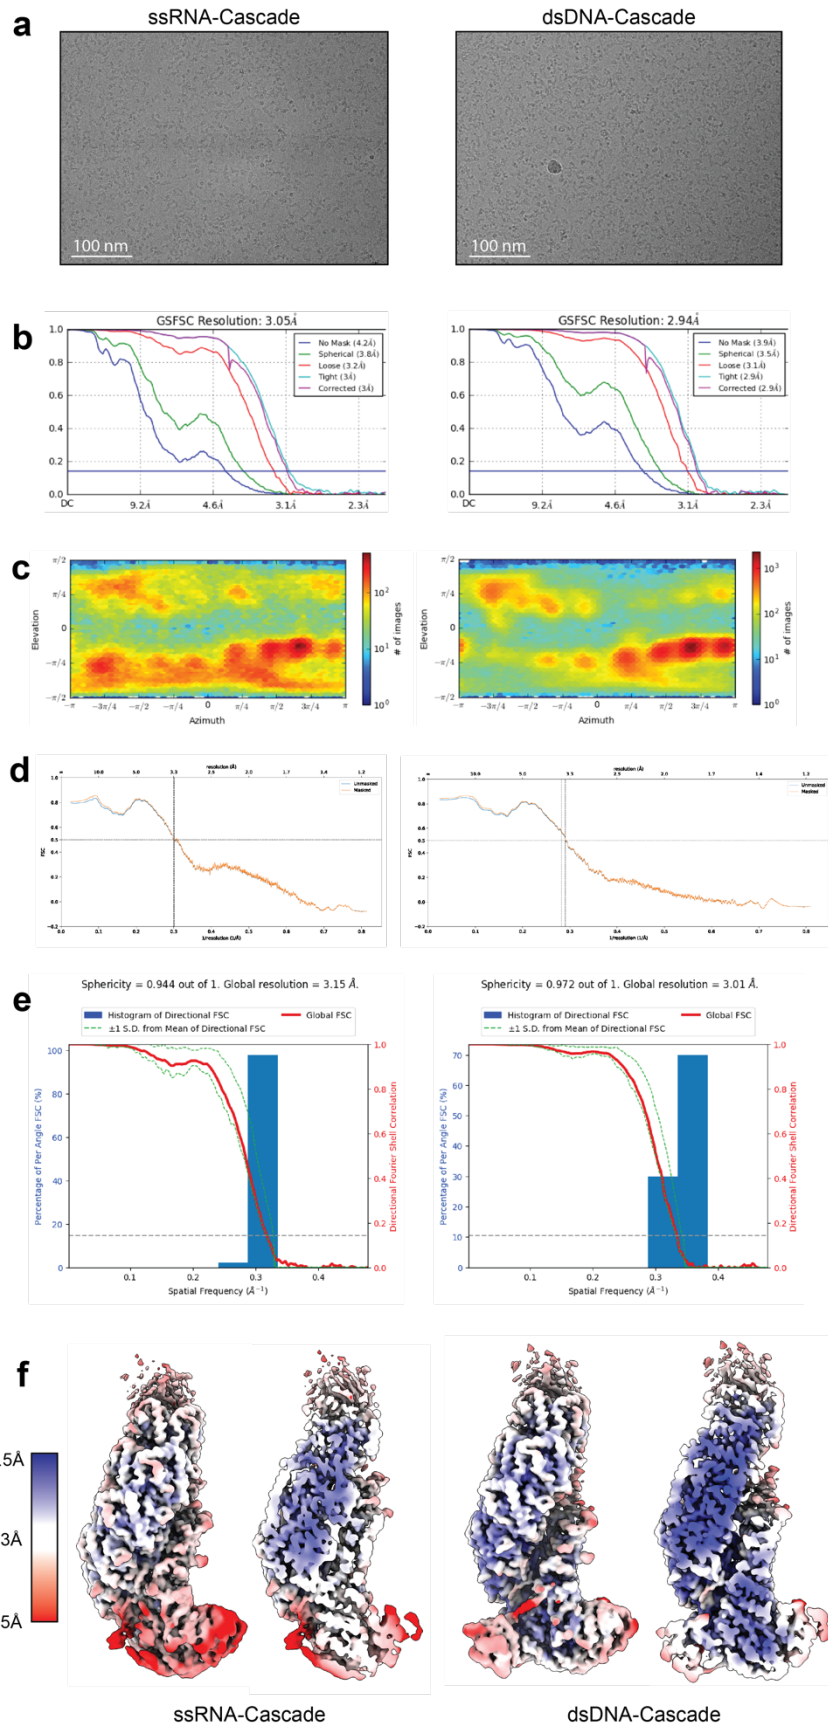

**Supplementary Fig. 3: Statistics and structure validation of the two cryo-EM maps. a,** Motion corrected cryo-electron micrographs of the ssRNA-Cascade and dsDNA-Cascade data collection. **b,** FSC plot of the two maps based on the 0.143 gold standard of two half maps. **c,** Euler angular distribution plot showing orientation of the particles that contributed to the final 3D model. **d,** Map-to-Model resolution for the dsDNA model (left) and ssRNA model (right) at an FSC of 0.5. **e,** Sphericity plot showing the spatial frequency of each model. The range of one standard deviation is represented in a dashed green curve. **f,** The two final maps colored by local resolution.

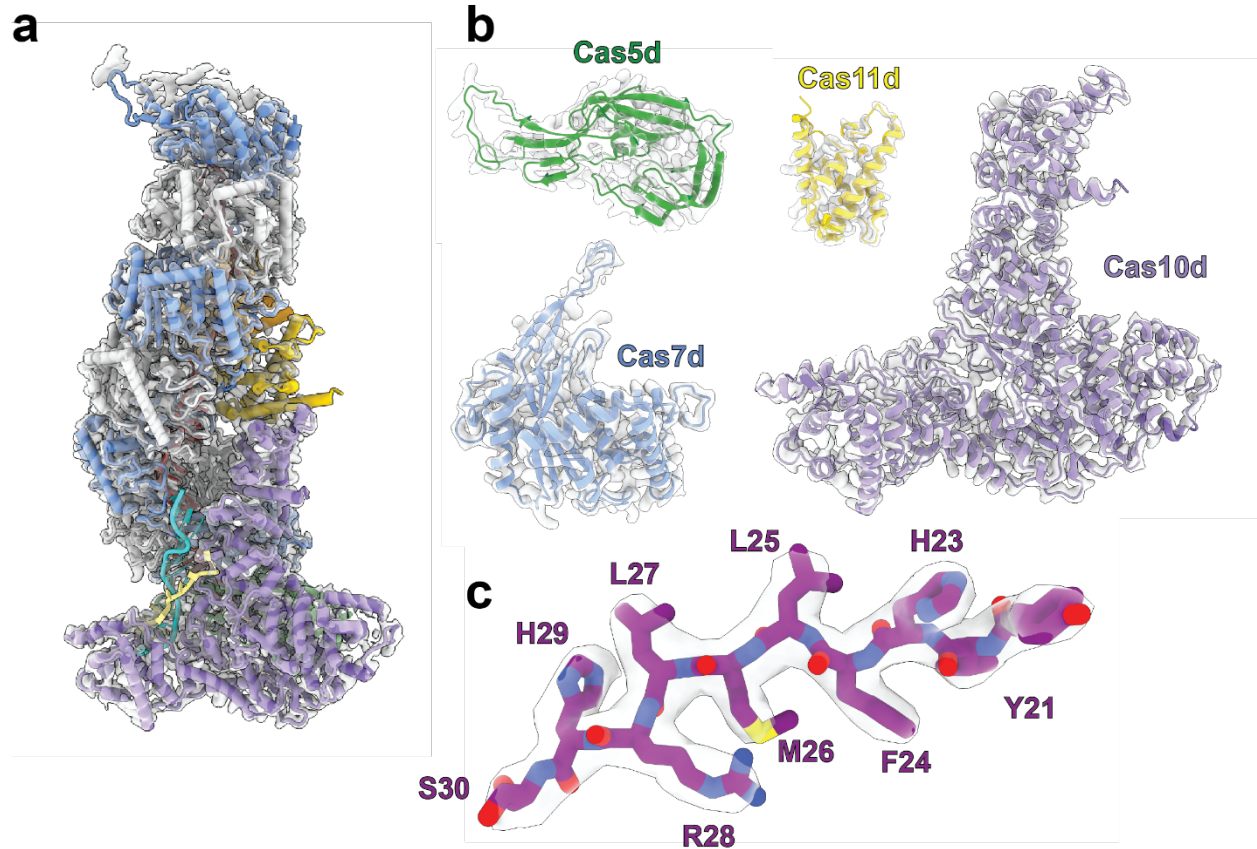

**Supplementary Fig. 4: Type I-D Cascade EM map quality.** **a**, Model of the full type I-D Cascade fit into the EM map. **b**, Individual subunits fit into their corresponding density. **c**, Beta strand within Cas7d shown to represent resolution quality within the map.

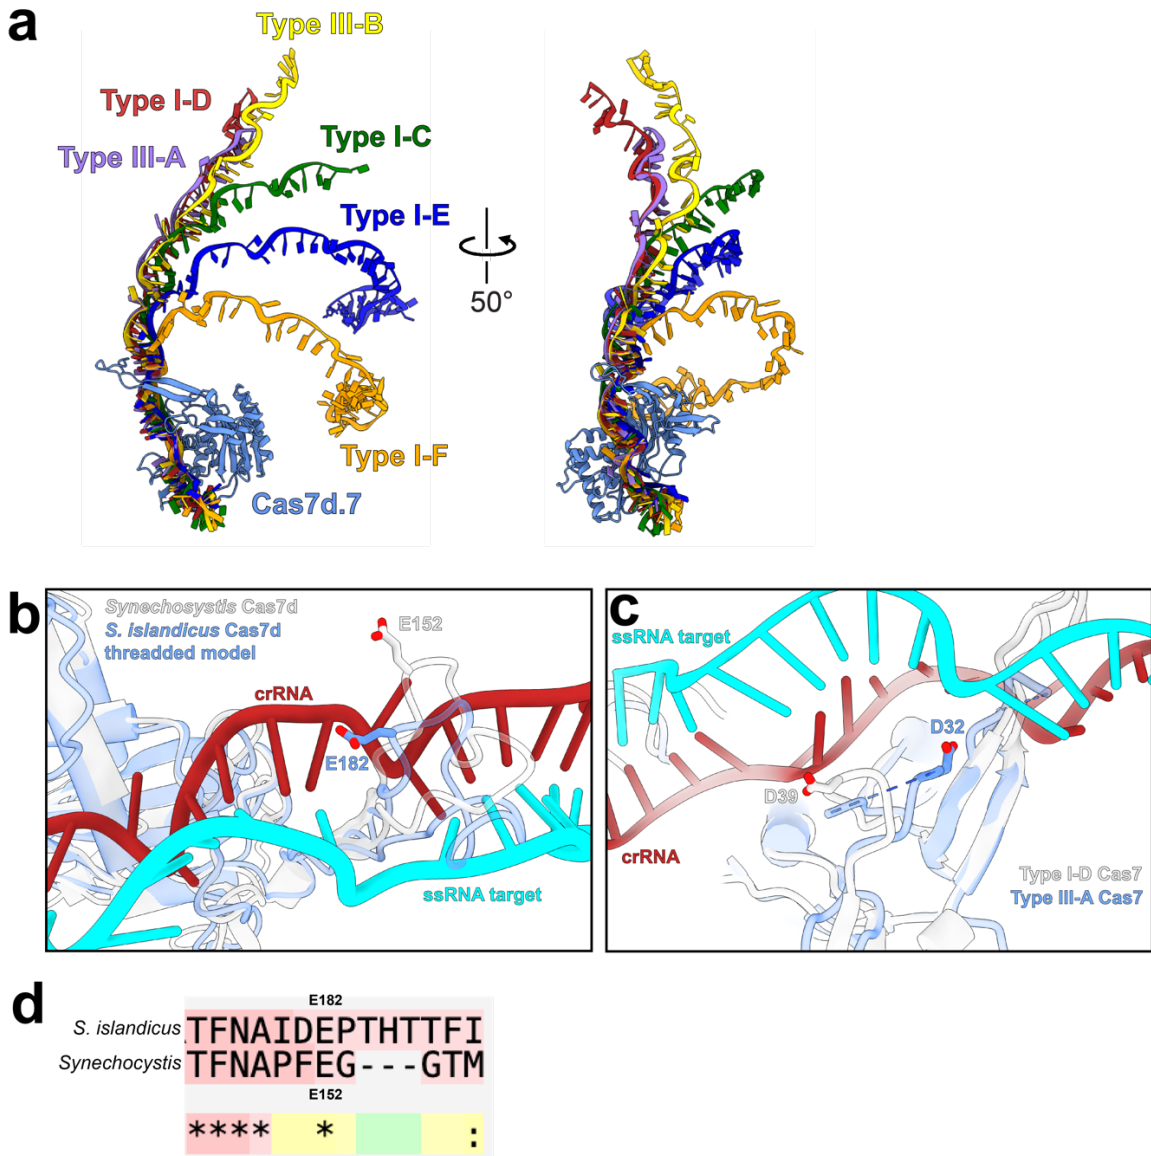

**Supplementary Fig. 5: crRNA geometry and Cas7 comparison between various type I and type III systems.** **a**, CRISPR RNA geometries overlaid by aligning the Cas7 subunits of each subtype. The type I-D crRNA angular geometry appears to align better with the type III-A and type III-B crRNAs than any type I crRNA. The range of crRNA angles provides a potential delineation of the evolution between these CRISPR subtypes. **b**, Comparison of the *S. islandicus* Cas7d sequence threaded onto our *Synechocystis* Cas7d model. The predicted active residue of E182 aligns both structurally and in sequence space, as shown in **d**. Neither residue is positioned to cleave the kinked ssRNA target. **c**, Comparison of the active residue D32 from the type III-A system and D39 from type I-D. D39 does not appear to be in a position to cleave the ssRNA target, while D32 does.

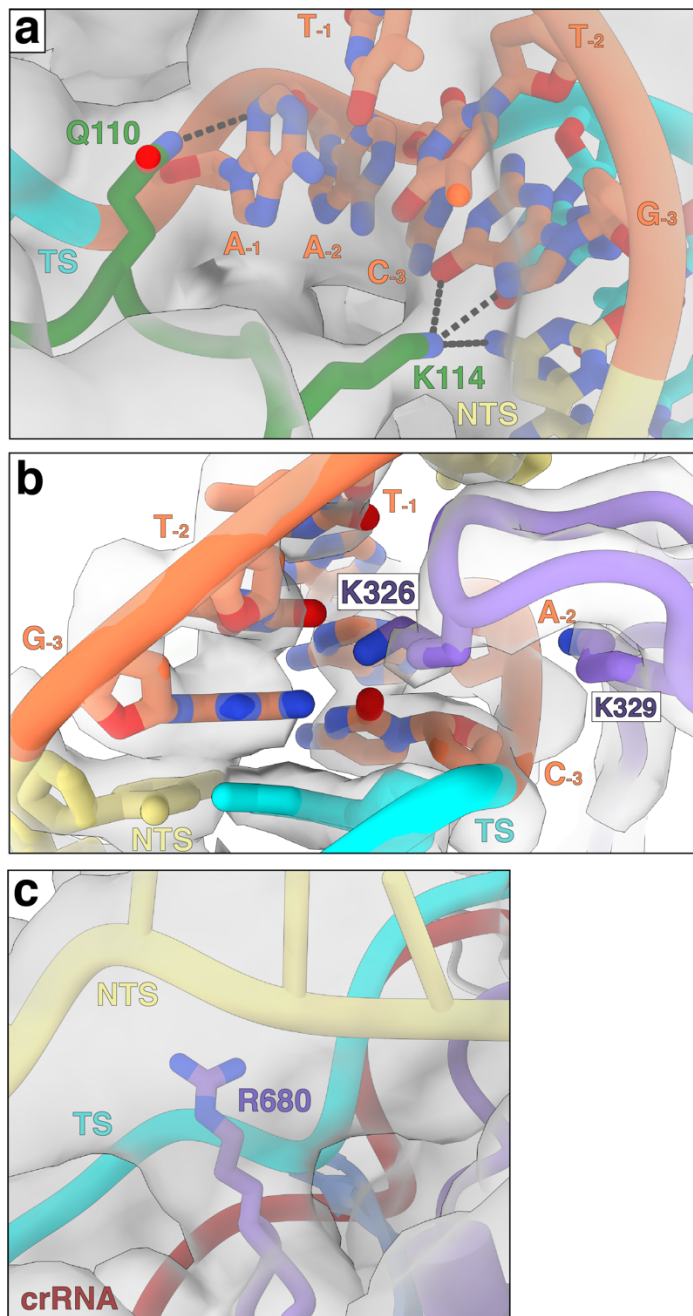

**Supplementary Fig. 6: Cas10d and Cas5d contacts with the dsDNA target. a**, Q110 and K114 of Cas5d interact with PAM bases A (-1 position) of the TS and G (-3 position) of the NTS, respectively. **b**, Representative EM density for the PAM recognition residue, K326, and the PAM duplex. **c**, R680 of Cas10d is one of the residues that contacts the NTS backbone to guide the NTS towards the Cas10d HD site.

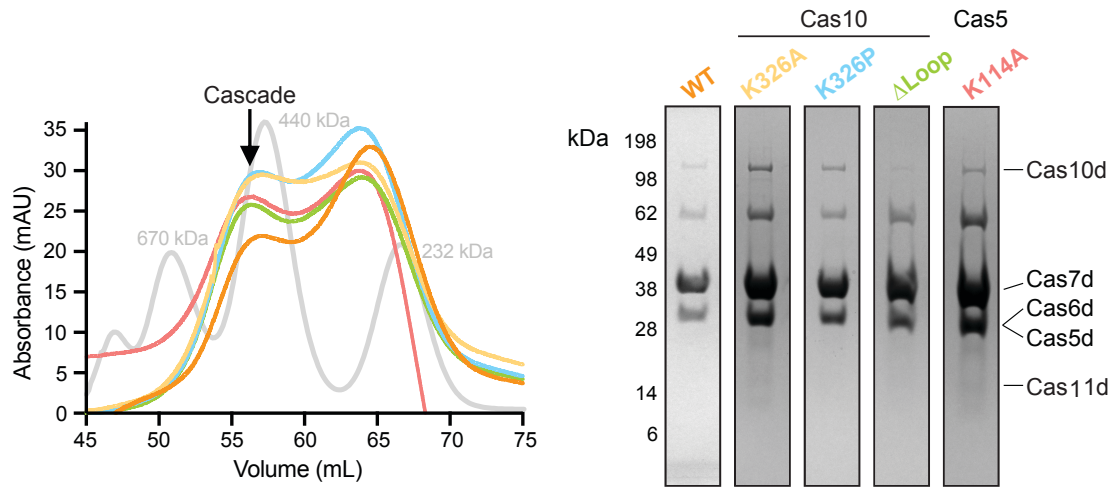

**Supplementary Fig. 7:** Purification of I-D Cascade with mutations in Cas10d and Cas5d residues that contact with the dsDNA target. **a**, Size exclusion chromatography profile of the I-D Cascade PAM-interacting mutants. Source Data is provide as Source Data file. **b**, SDS-PAGE analysis of each I-D Cascade mutant, collected at the 55 mL elution volume from the size exclusion chromatography profile in **a**. Uncropped gel images are provided in Supplementary Data 2.

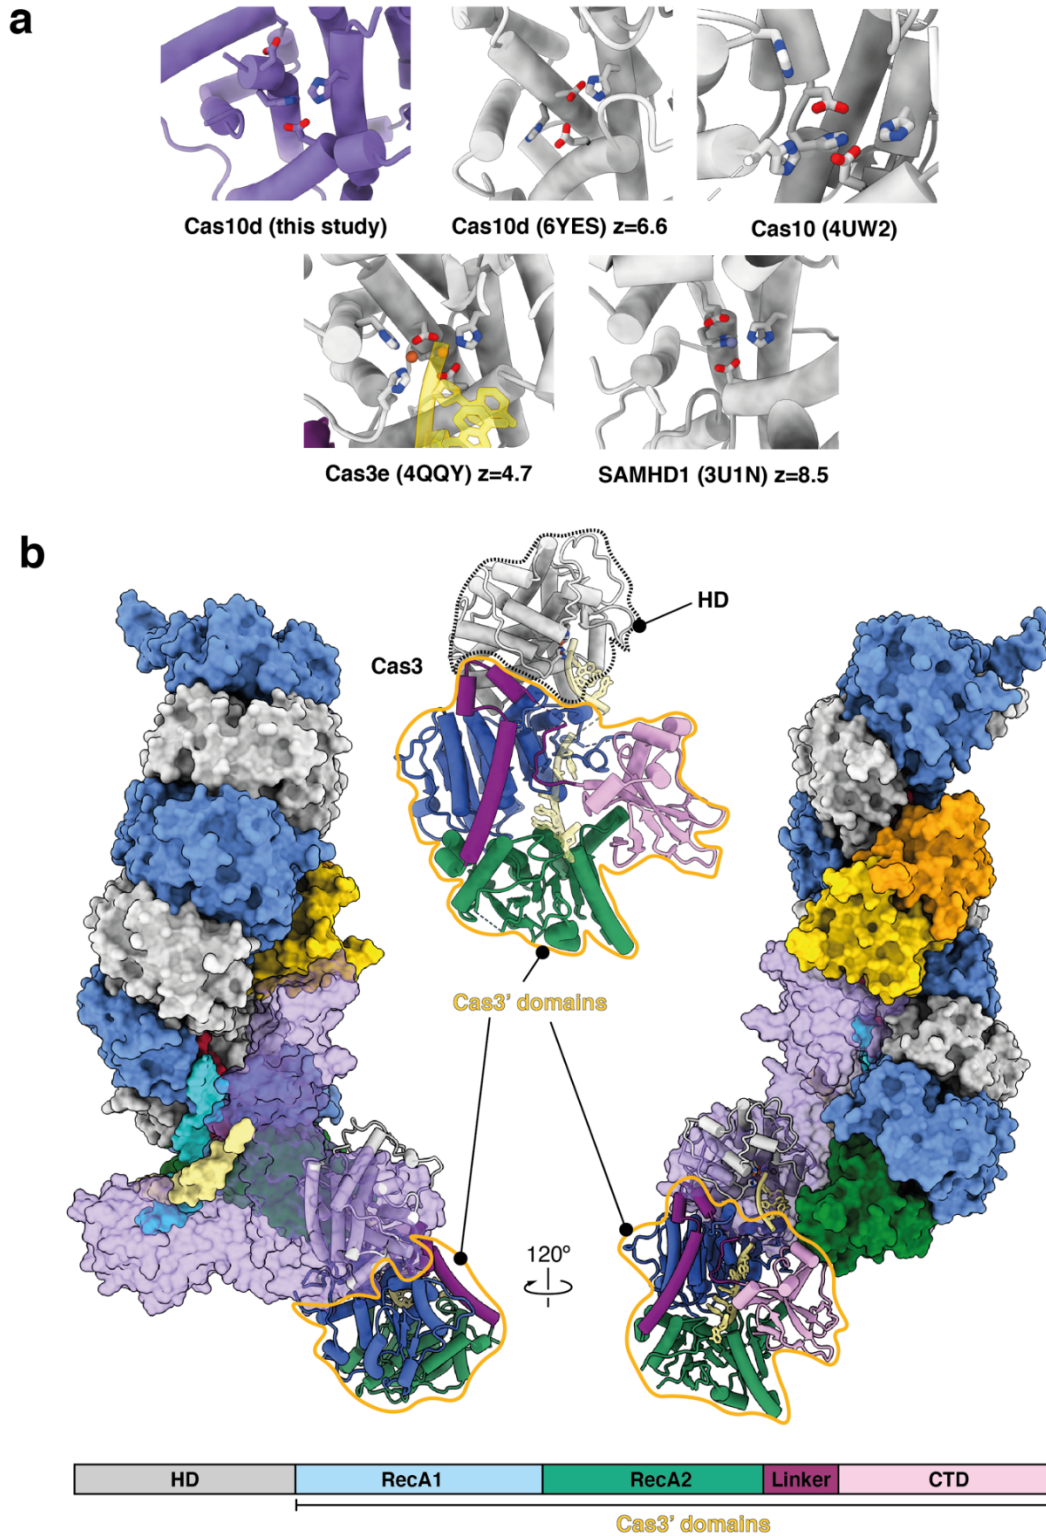

**Supplementary Fig. 8: HD Comparison and Cas3' docking prediction.** **a**, HD comparison between *Synechocystis* Cas10d, *S. islandicus* Cas10d, *T. onnurineus* Type III-A Cas10, *T. fusca* Cas3e, and *H. sapiens* SAMHD1. Z scores for the structural overlap are listed. SAMHD1 was



included since it was the best structural homologue (i.e. had the highest Z-score) to Cas10d HD domain and has a representative HD domain active site. Type III Cas10 structures are typically poorly resolved around the HD domain, and therefore were not identified as structurally similar to our Cas10d model. The type III-A Cas10 has no Z-score due to a lack of significant structural homology to our Cas10d HD domain. **b**, Cas3e HD domain overlaid onto the Cas10d HD domain. The Cas3e helicase domains interestingly protrude out exactly where Cas3' may bind.

**Cas3**  
(*T. fusca* Type I-E)  
No circular permutation

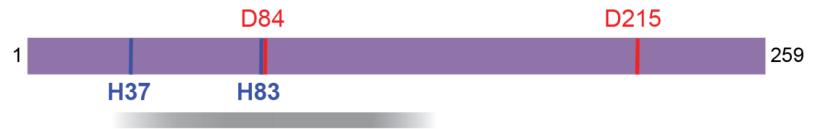

**Cas10**  
(*P. furiosus* Type III-B)  
Circular permutation

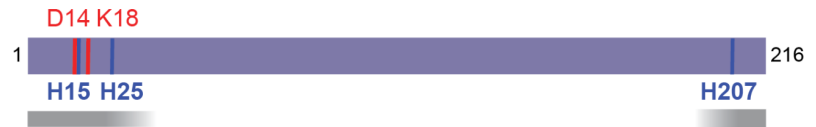

**Cas3''**  
(*Synechocystis* Type I-D)  
No circular permutation

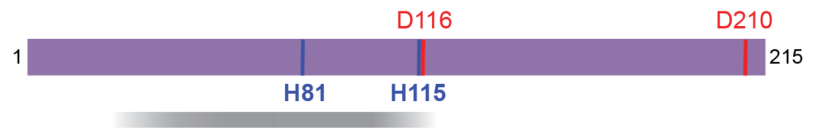

**Cas3''**  
(*S. islandicus* Type I-D)  
No circular permutation

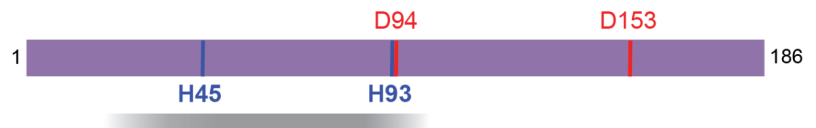

**Supplementary Fig. 9:** Ion coordinating histidines within the HD domains in type I (Cas3) and type III (Cas10) systems. Histidines within the HD domain comparison between *T. fusca* type I-E Cas3, *P. furiosus* type III-B Cas10, *Synechocystis* type I-D Cas3'', and *S. islandicus* type I-D Cas3''. Position of histidines (grey shading) indicative of a circular permutation (shading split in two) or no circular permutation (shading clustered). Numbers indicate amino acid position within the protein.

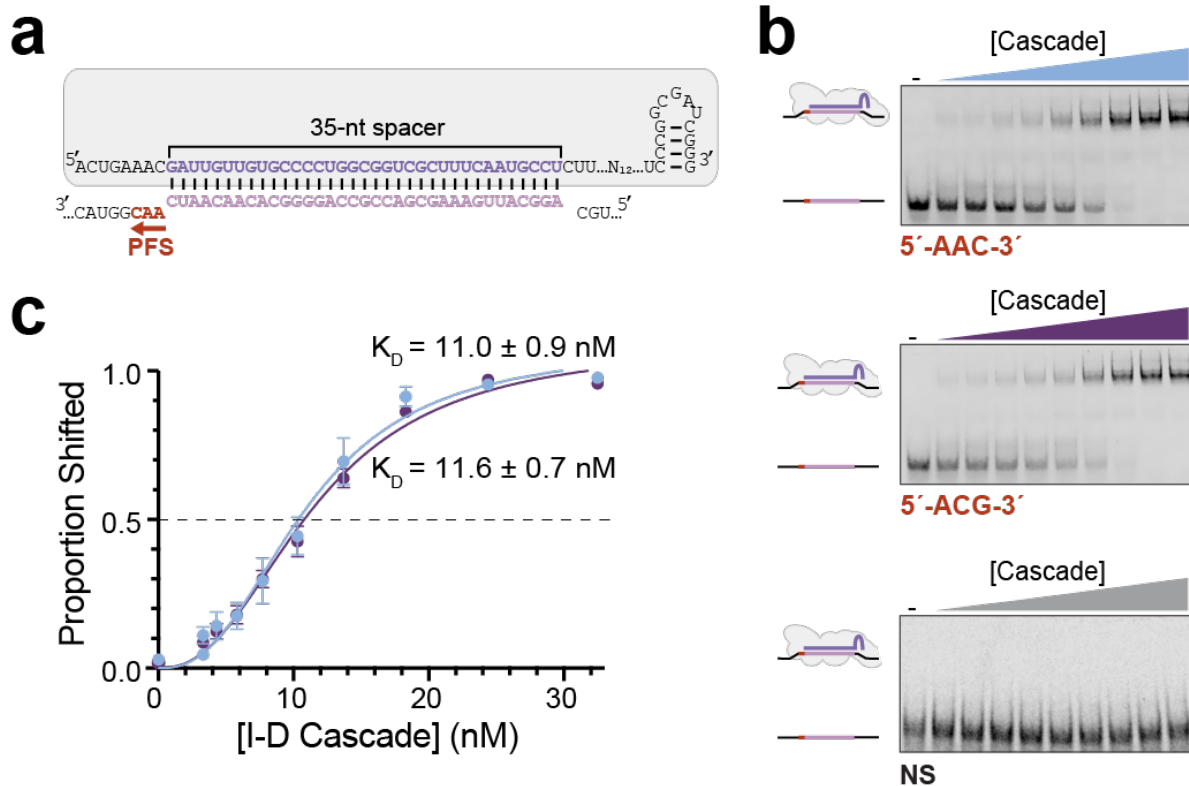

**Supplementary Fig. 10. Role of PFS in ssRNA binding** **a**, Schematic representation of type I-D Cascade (grey protein and purple crRNA) binding to complementary target sequence (protospacer; pink). **b**, Representative mobility shifts of fluorescently labeled protospacer ssRNA with various three-nucleotide protospacer flanking sequences (PFS): 5'-AAC-3' (blue), 5'-ACG-3' (purple), and a non-specific (NS) probe (grey) with increasing amounts of type I-D Cascade ranging from 3 to 33 nM in 1.33x increments. Three independent assays were performed. **c**, Dose-response curves of the proportion of shifted-probe as a function of type I-D Cascade concentration. The blue curve corresponds to the 5'-AAC-3' PFS probe and the purple curve corresponds to the 5'-ACG-3' PFS probe. Data are represented as mean  $\pm$  SEM. The apparent dissociation constants ( $K_D$ ) are based on three independent assays. A  $K_D$  could not be determined for the non-specific RNA target (panel **b**, bottom). Source Data are provided as a Source Data file.

## Supplementary Data

**Supplementary Data 1.** Uncropped gel image for **Supplementary Fig. 1b**.

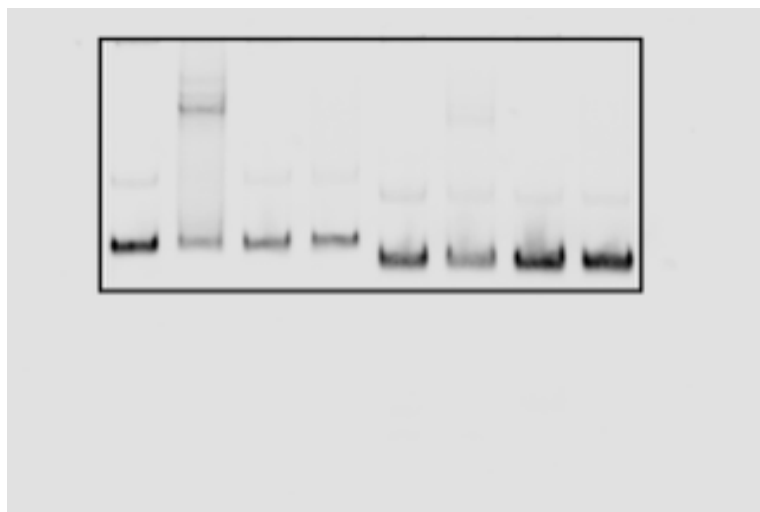

**Supplementary Data 2. Uncropped gel images for Supplementary Fig. 7.**

WT SDS-PAGE

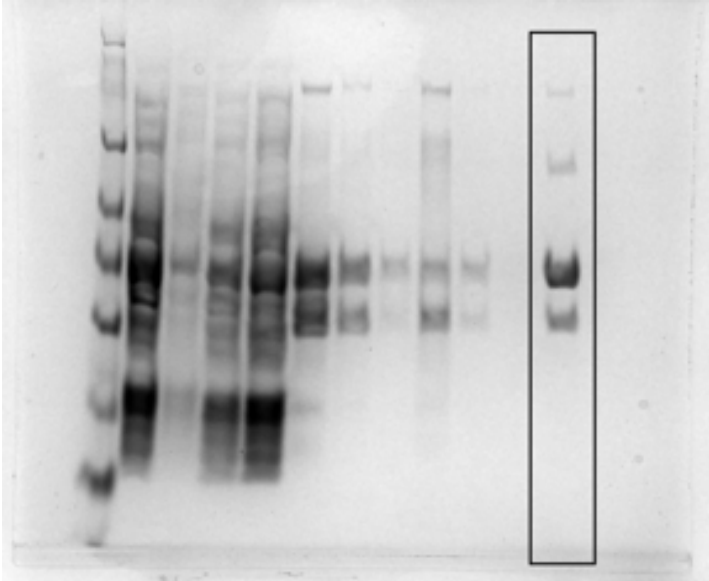

K326A SDS-PAGE

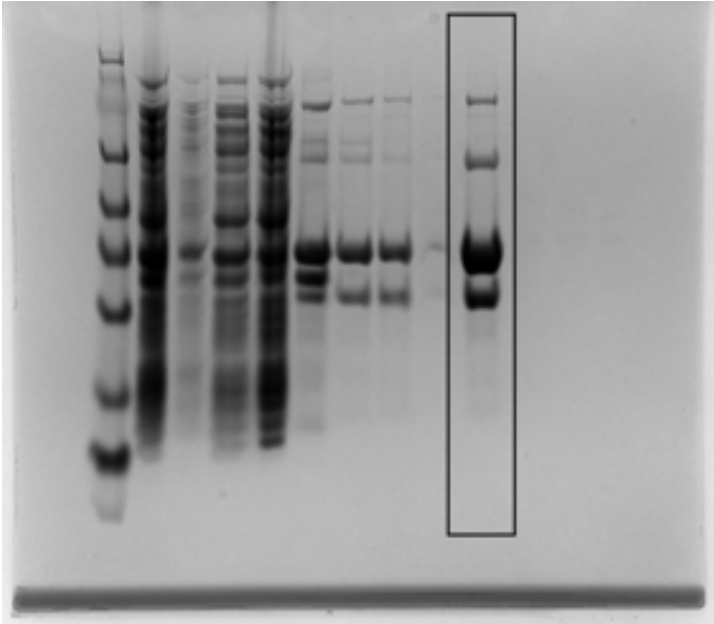

K326P SDS-PAGE

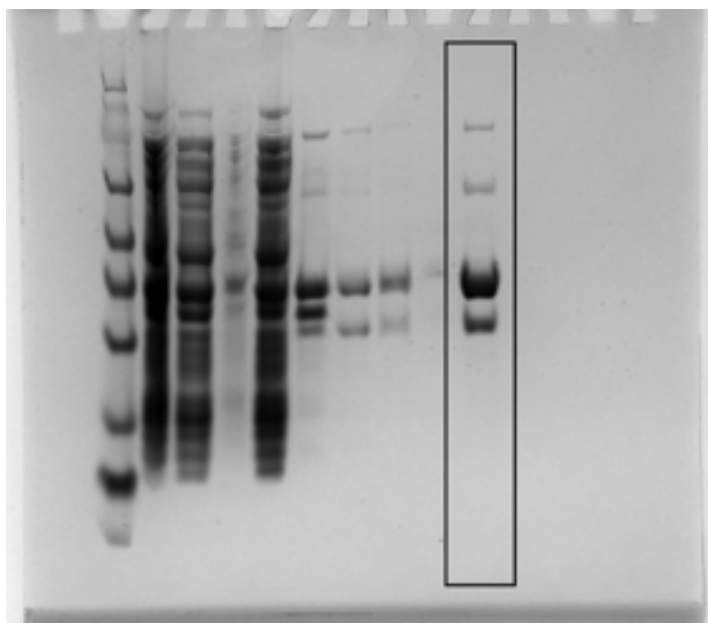

$\Delta$ Loop SDS-PAGE

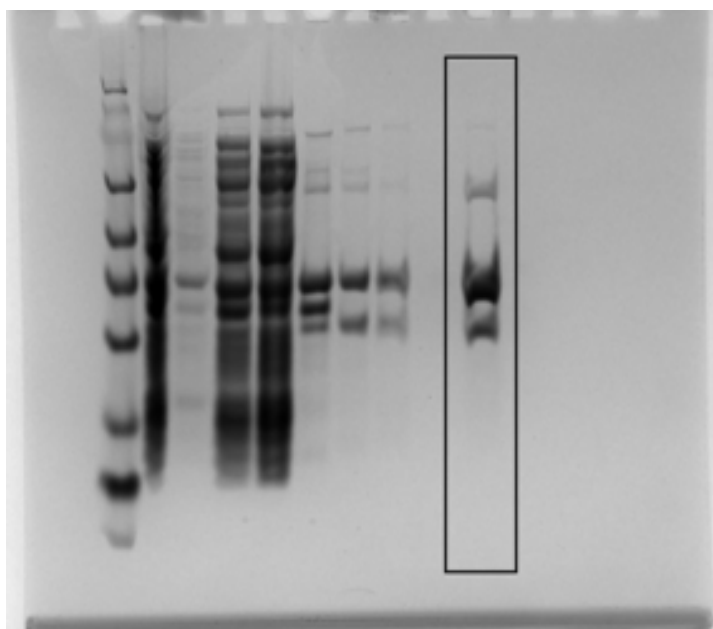

K114A SDS PAGE

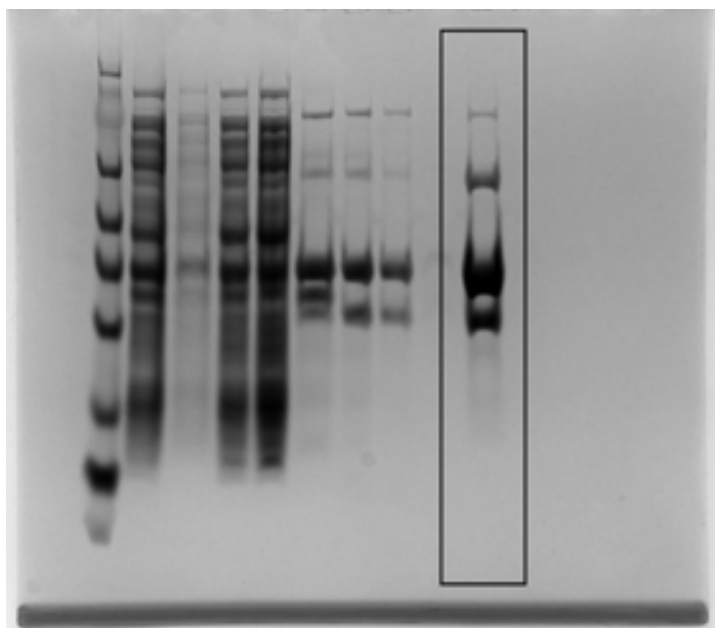

Supplement: 41467_2022_30402_MOESM1_ESM.pdf [file 41467_2022_30402_MOESM1_ESM.pdf]
